# Supplementary material for: Evans syndrome in adults: an observational multicenter study
Source: PubMed Central journal article supplement — Blood Adv. 2021 Dec 16;5(24):5468–78. doi: 10.1182/bloodadvances.2021005610 (PMC8714709; doi:10.1182/bloodadvances.2021005610), 2021-12-16
Supplement: advancesADV2021005610-suppl1.pdf [file advancesADV2021005610-suppl1.pdf]

**Supplementary table 1**

| 1st line N=115                 | 2nd line N=88            | 3rd line N=63        | 4th line N=33        | 5th line N=21         | 6th line N=19        | 7th line N=10               | 8th line N=10       | 9th line N=2           |
|--------------------------------|--------------------------|----------------------|----------------------|-----------------------|----------------------|-----------------------------|---------------------|------------------------|
| <b>ITP N=41<sup>^</sup></b>    | <b>- ITP* N=44</b>       | <b>- ITP N=31</b>    | <b>- ITP N=17***</b> | <b>- ITP N=14****</b> | <b>- ITP N=13</b>    | <b>ITP N=4</b>              | <b>- ITP N=5</b>    | <b>- ITP N=1</b>       |
| Steroids 26, 23 R              | Steroids 18, 18 R        | Steroids 13, 13 R    | Steroids 5, 5 R      | Steroids 3, 3 R       | Steroids 8, 8 R      | Steroids 4, 4 R             | Steroids 2, 1 R     | -                      |
| Steroids+IVIG 10, 8 R          | Steroids+IVIG 8, 8 R     | Steroids+IVIG 6, 5 R | Steroids+IVIG 2, 2 R | Steroids+IVIG 3, 3 R  | Steroids+IVIG 3, 3 R | -                           | -                   | -                      |
| IST 3, 2 R                     | IST 5, 5 R               | IST 3, 3 R           | IST 3, 3 R           | IST 1, 1 R            | -                    | -                           | -                   | -                      |
| Danazol 1, 1 R                 | -                        | -                    | -                    | Danazol 1, 1 R        | -                    | -                           | IST 2, 1 R          | -                      |
| Rituximab 1, 1 R               | Rituximab 5, 4 R         | Rituximab 2, 2 R     | Rituximab 3, 2 R     | Rituximab 2, 2 R      | -                    | -                           | -                   | -                      |
| Splenectomy 2, 2 R             | Splenectomy 2, 2 R<br>OR | Splenectomy 2, 2 R   | Splenectomy 2, 2 R   | -                     | -                    | -                           | -                   | -                      |
| 1 TPO-RA, 1 R                  | TPO-RA 8, 7 R            | TPO-RA 5, 5 R        | TPO-RA 3, 2 R        | TPO-RA 5, 4 R         | TPO-RA 2, 2 R        | TPO-RA 1, 1 R               | TPO-RA 2, 0 R       | TPO-RA+ofatumumab, 1 R |
| <b>- AIHA N=38<sup>^</sup></b> | <b>- AIHA* N=36</b>      | <b>- AIHA N=26**</b> | <b>- AIHA N=14</b>   | <b>- AIHA N=6****</b> | <b>- AIHA N=6</b>    | <b>- AIHA N=5</b>           | <b>- AIHA N=5</b>   | <b>- AIHA N=1</b>      |
| Steroids 25, 21 R              | Steroids 13, 13 R        | Steroids 5, 5 R      | Steroids 8, 8 R      | Steroids 2, 2 R       | -                    | Steroids 2, 2 R             | Steroids 1, 1 R     | -                      |
| Steroids+IVIG 3, 2 R           | Steroids+IVIG 2, 1 R     | Steroids+IVIG 3, 3 R | -                    | Steroids+IVIG 1, 1 R  | -                    | -                           | -                   | -                      |
| Rituximab 3, 3 R               | Rituximab 15, 14 R       | Rituximab 10, 10 R   | Rituximab 4, 4 R     | Rituximab 2, 2 R      | Rituximab 3, 3 R     | Rituximab 1, 1 R            | Rituximab 1, 0 R    | -                      |
| IST 5, 5 R                     | IST 5, 5 R               | IST 4, 3 R           | IST 2, 2 R           | IST 2, 2 R            | IST 2, 2 R           | IST 2, 1 R                  | IST 1, 1 R          | IST 1, 1 R             |
| Splenectomy 2, 2 R             | Splenectomy 3, 3 R       | Splenectomy 3, 3 R   | -                    | Splenectomy 1, 1 R    | -                    | -                           | -                   | -                      |
| Danazol 1, 1 R                 | -                        | Danazol 3, 2 R       | -                    | -                     | -                    | -                           | Fostamatinib 1, 1 R | -                      |
|                                |                          | Parsaclisib 1, 1 R   | -                    | -                     | rEPO 1, 1 R          | -                           | PEX 1, 1 R          | -                      |
| <b>- BOTH N=36<sup>^</sup></b> | <b>- BOTH N=8</b>        | <b>- BOTH N=6</b>    | <b>- BOTH N=2</b>    | <b>- BOTH N=1</b>     | <b>- BOTH N=0</b>    | <b>- BOTH N=1</b>           | <b>- BOTH N=0</b>   | <b>- BOTH N=0</b>      |
| Steroids 14, 11 R              | Steroids 1, 1 R          | -                    | -                    | -                     | -                    | -                           | -                   | -                      |
| Steroids+IVIG 10, 8 R          | -                        | -                    | -                    | -                     | -                    | -                           | -                   | -                      |
| Rituximab 8, 7 R               | Rituximab 6, 6 R         | Rituximab 4, 4 R     | Rituximab 2, 2 R     | Rituximab 1, 1 R      | -                    | -                           | -                   | -                      |
| IST 3, 3 R                     | IST 1, 1 R               | -                    | -                    | -                     | -                    | -                           | -                   | -                      |
| TPO-RA 2, 2 R                  | -                        | TPO-RA 2, 2 R        | -                    | -                     | -                    | TPO-RA + tocilizumab 1, 1 R | -                   | -                      |
| Danazol 1, 1 R                 | -                        | -                    | -                    | -                     | -                    | -                           | -                   | -                      |
| PEX 1, 1 R                     | -                        | -                    | -                    | -                     | -                    | -                           | -                   | -                      |

Some patients received more than 1 therapy in the same line: <sup>^</sup>1 ITP received splenectomy, rituximab and TPO-RA; 1 AIHA received IST and splenectomy, 1 concomitant AIHA/ITP received rituximab+IST, 2 TPO-RA+rituximab. \*2 ITP treated with TPO-RA after splenectomy; 1 AIHA received IST, splenectomy and rituximab. \*\* 1 AIHA patient received danazol and rituximab; 2 AIHA patients received CTX and rituximab. \*\*\*1 ITP received rituximab and TPO-RA. \*\*\*\* 1 ITP received both IST and TPO-RA; 1 AIHA received rituximab, IST and splenectomy.

**Supplementary table 2. Death rates (per 100 person-years) and hazard ratios of death according to age category and occurrence of intermediate time-dependent outcomes.**

| <b>Time-dependent variable</b> | <b>No. subjects</b> | <b>No. deaths</b> | <b>Person-years</b> | <b>Death rate (per 100 person-years)</b> | <b>Crude HR</b> | <b>95% CI</b> | <b>Adjusted HR*</b> | <b>95% CI</b> |
|--------------------------------|---------------------|-------------------|---------------------|------------------------------------------|-----------------|---------------|---------------------|---------------|
| <b><i>Age (years)</i></b>      |                     |                   |                     |                                          |                 |               |                     |               |
| <b>&lt;65</b>                  | 81                  | 7                 | 771                 | 0.9                                      | 1.00            | Reference     | 1.00                | Reference     |
| <b>65-79</b>                   | 27                  | 9                 | 145                 | 6.2                                      | 8.30            | 2.75-25.0     | 5.47                | 1.72-17.4     |
| <b>80+</b>                     | 8                   | 7                 | 47                  | 14.7                                     | 21.7            | 6.52-72.3     | 21.0                | 5.84-75.2     |
| <b><i>Relapse</i></b>          |                     |                   |                     |                                          |                 |               |                     |               |
| <b>No</b>                      | 27                  | 6                 | 479                 | 1.3                                      | 1.00            | Reference     | 1.00                | Reference     |
| <b>Yes</b>                     | 89                  | 17                | 484                 | 3.5                                      | 6.18            | 2.11-18.1     | 3.65                | 1.1.3-11.8    |
| <b><i>Infection</i></b>        |                     |                   |                     |                                          |                 |               |                     |               |
| <b>No</b>                      | 78                  | 11                | 853                 | 1.3                                      | 1.00            | Reference     | 1.00                | Reference     |
| <b>Yes</b>                     | 38                  | 12                | 110                 | 10.9                                     | 10.3            | 4.31-24.7     | 6.76                | 2.63-17.4     |
| <b><i>Thrombosis</i></b>       |                     |                   |                     |                                          |                 |               |                     |               |
| <b>No</b>                      | 91                  | 16                | 903                 | 1.8                                      | 1.00            | Reference     | 1.00                | Reference     |
| <b>Yes</b>                     | 25                  | 7                 | 60                  | 11.6                                     | 6.85            | 2.69-17.4     | 6.13                | 1.99-18.9     |

CI, confidence interval; HR, hazard ratio

\*Each variable adjusted for the other in a multivariable Cox regression model

**Supplementary table 3. Multivariable analysis for overall mortality including only patients who died due to direct Evans syndrome complications. HR hazard risk. 95% CI confidence interval.**

| <b>covariate</b> | <b>Hazard ratio</b> | <b>Standard Error</b> | <b>z</b> | <b>P</b> | <b>95% Conf. Interval</b> | <b>N. of deaths</b> |
|------------------|---------------------|-----------------------|----------|----------|---------------------------|---------------------|
| Age >65 years    | 2.56                | 2.17                  | 1.11     | 0.26     | 0.48-13.5                 | 4                   |
| Age >80 years    | 1.17                | 1.70                  | 0.11     | 0.91     | 0.06-20.4                 | 1                   |
| Relapse          | 2.47                | 2.46                  | 0.91     | 0.36     | 0.35-17.4                 | 8                   |
| Infections       | 33.7                | 33.6                  | 3.53     | 0.000    | 4.77-238.4                | 8                   |
| Thrombosis       | 15.5                | 14.5                  | 2.94     | 0.003    | 2.49-96.9                 | 4                   |
